# Supplementary material
Source: MDPI journal article supplement (https://www.mdpi.com/2073-8994/16/1/104)
Supplement: s1 [file s1]

Supplementary Materials

# Selectivity in Catalytic Asymmetric Formal [3 + 3] Annulation of 2-Enoyl-Pyridine *N*-Oxide with Benzyl Methyl Ketone

Zuzanna Wrzeszcz <sup>1</sup>, Jakub A. Warachim <sup>2</sup> and Renata Siedlecka <sup>1,\*</sup>

<sup>1</sup> Department of Organic and Medicinal Chemistry, Faculty of Chemistry, Wrocław University of Science and Technology, Wyb. Wyspiańskiego 27, 50-370 Wrocław, Poland; zuzanna.wrzeszcz@pwr.edu.pl

<sup>2</sup> Institute of Advanced Materials, Faculty of Chemistry, Wrocław University of Science and Technology, Wyb. Wyspiańskiego 27, 50-370 Wrocław, Poland; jakub.warachim@pwr.edu.pl

\* Correspondence: renata.siedlecka@pwr.edu.pl

## 1. Spectral Data

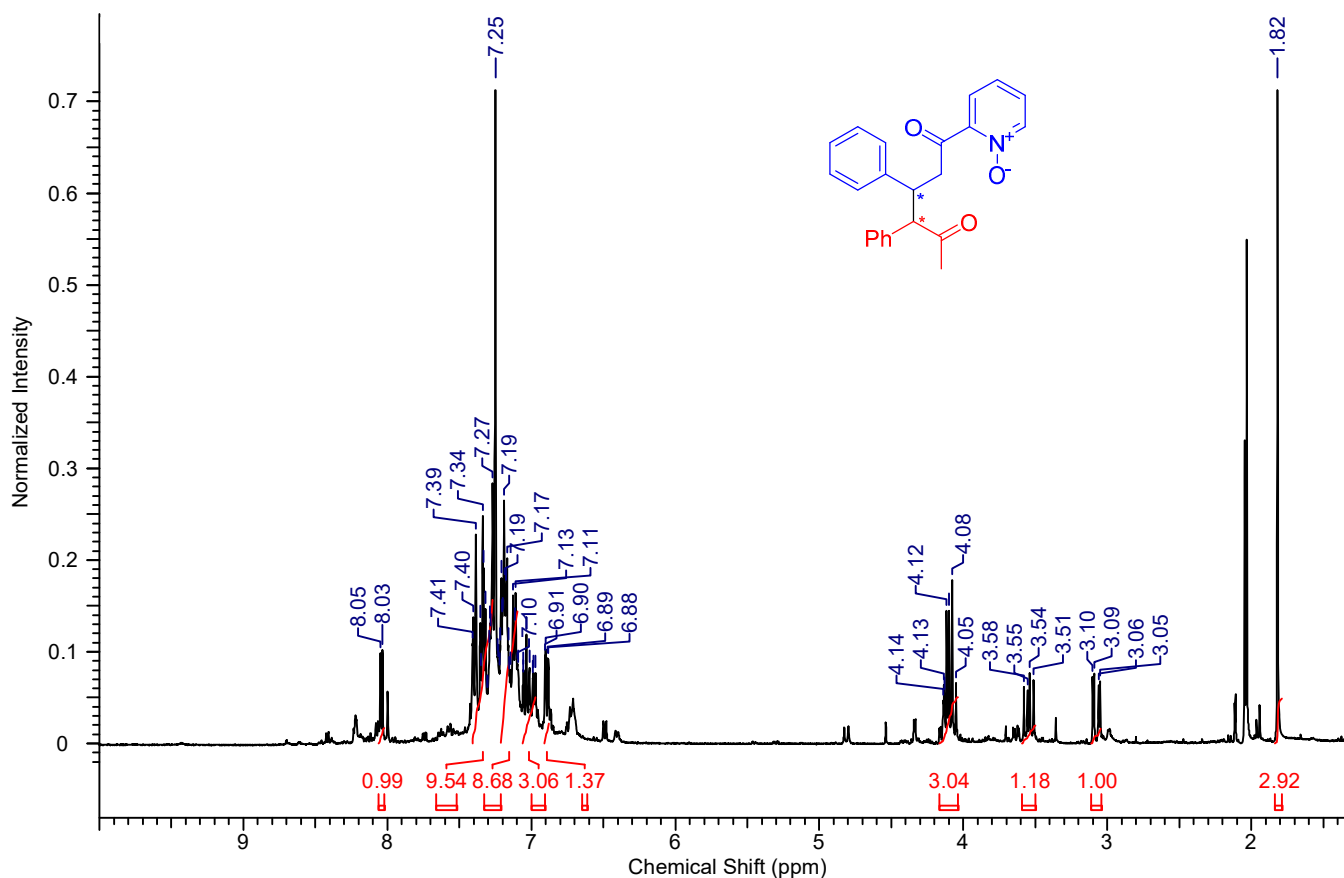

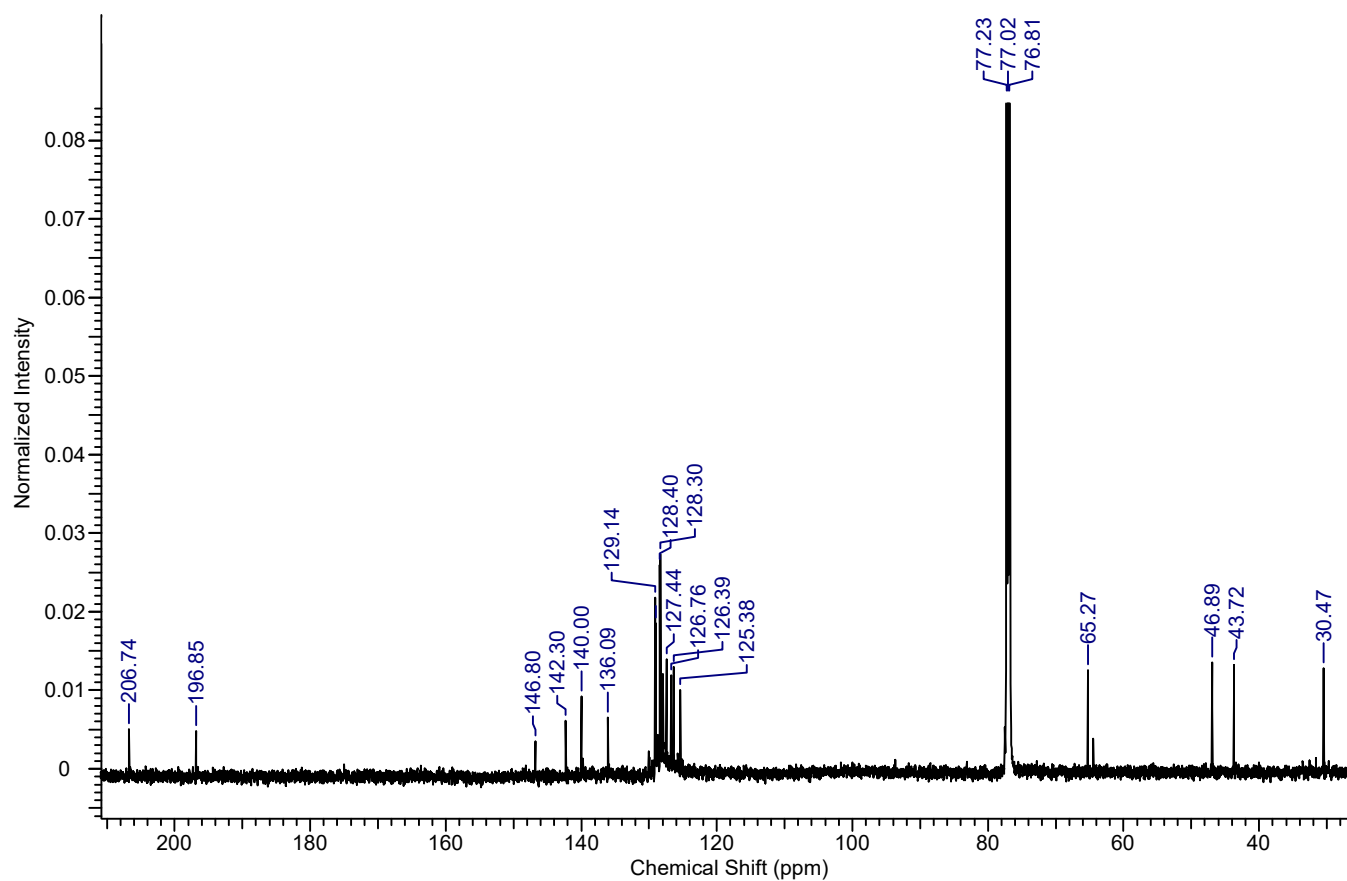

**Figure S1.**  $^1\text{H}$  and  $^{13}\text{C}$  NMR spectra of 2-(5-oxo-3,4-diphenyl-hexanoyl)pyridine 1-oxide - I.

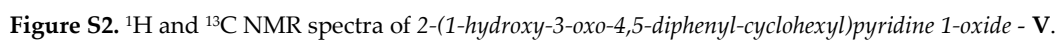

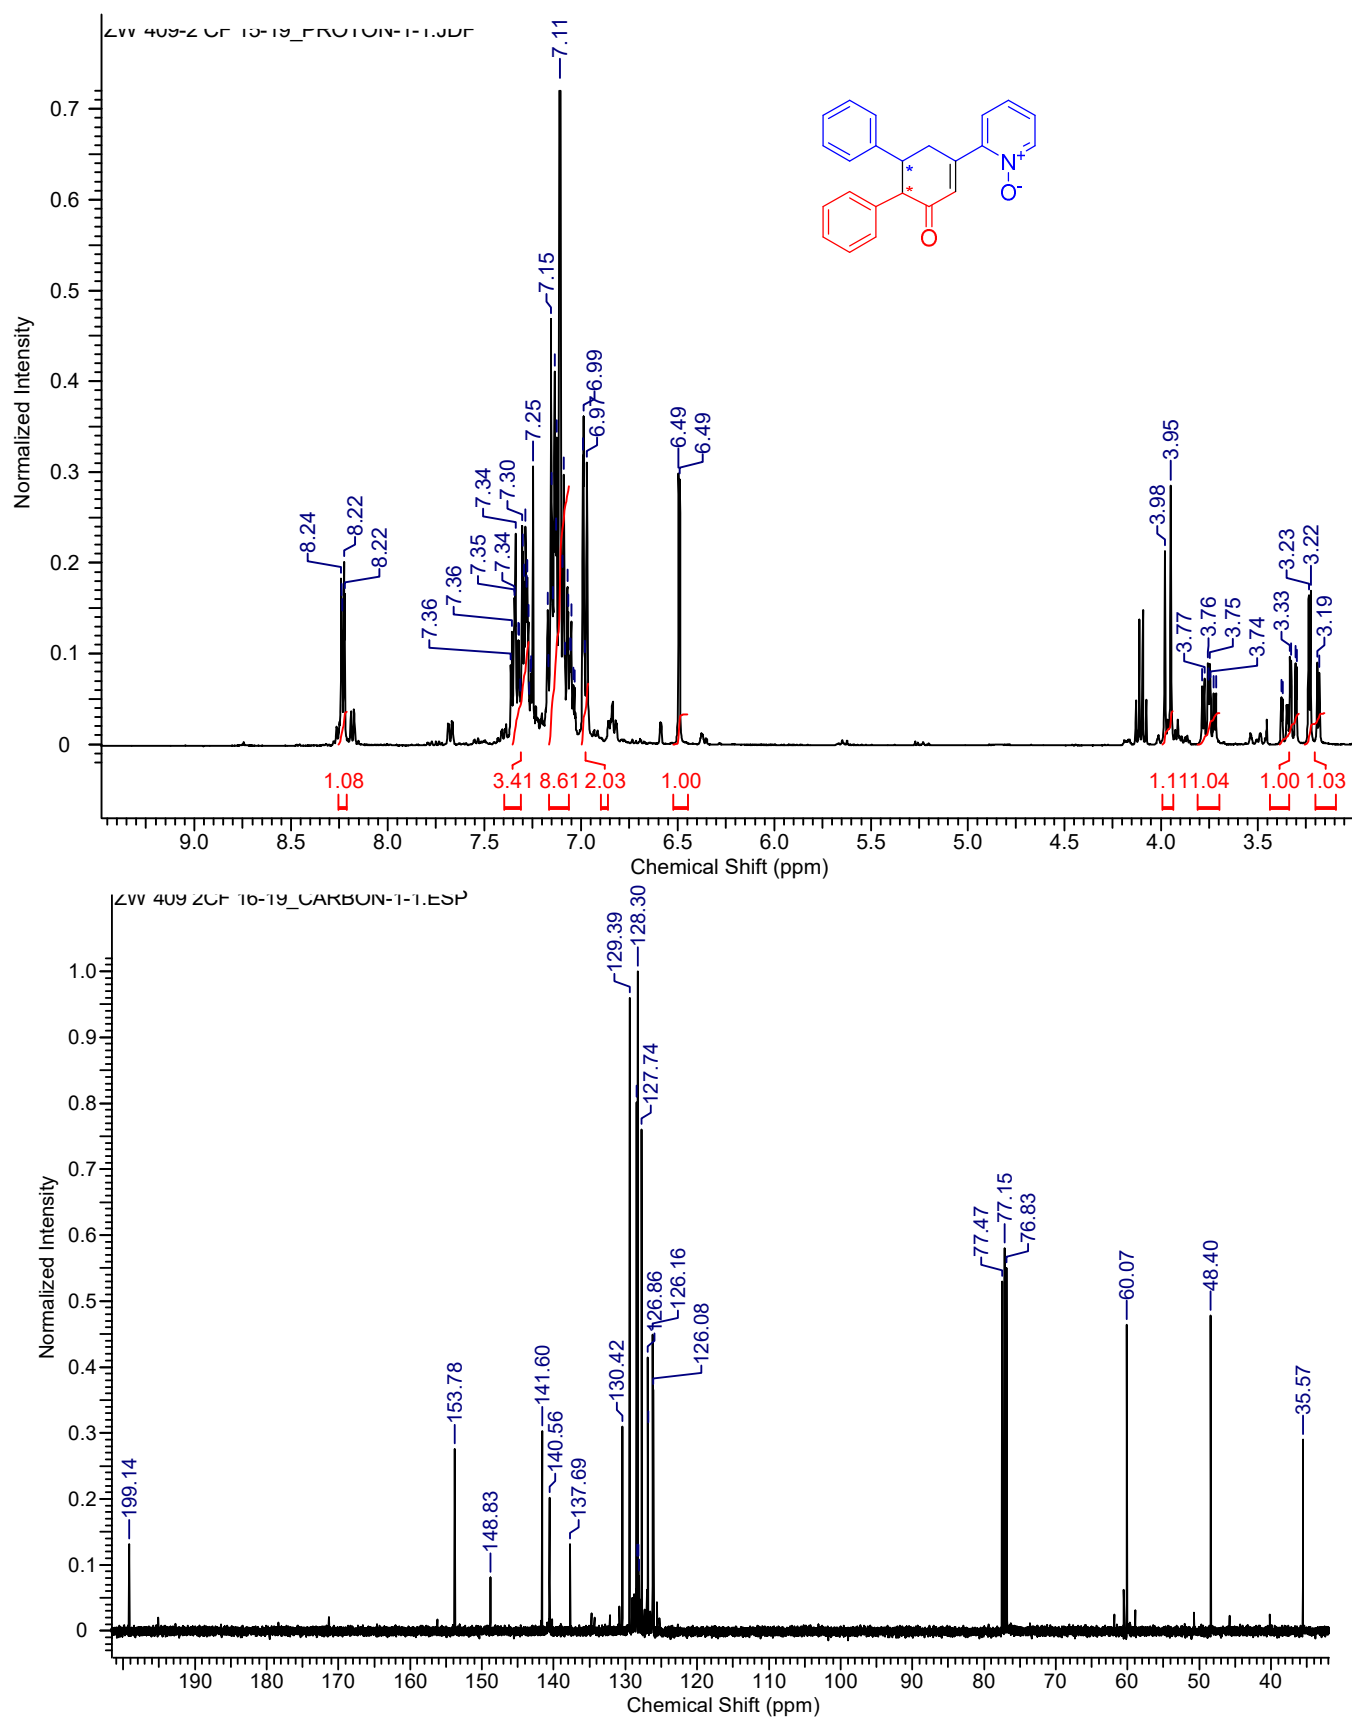

Figure S3. <sup>1</sup>H and <sup>13</sup>C NMR spectra of 2-(3-oxo-4,5-diphenyl-cyclohex-1-en-yl)pyridine 1-oxide - III.

## 2. HPLC Data

### 2.1. Formal [3+3] annulation of 2-cinammoylpyridine N-oxide and BMK

(Chiralpak IA-3 column, hexane/*i*-PrOH 8:2, flow rate 1.0 mL/min)

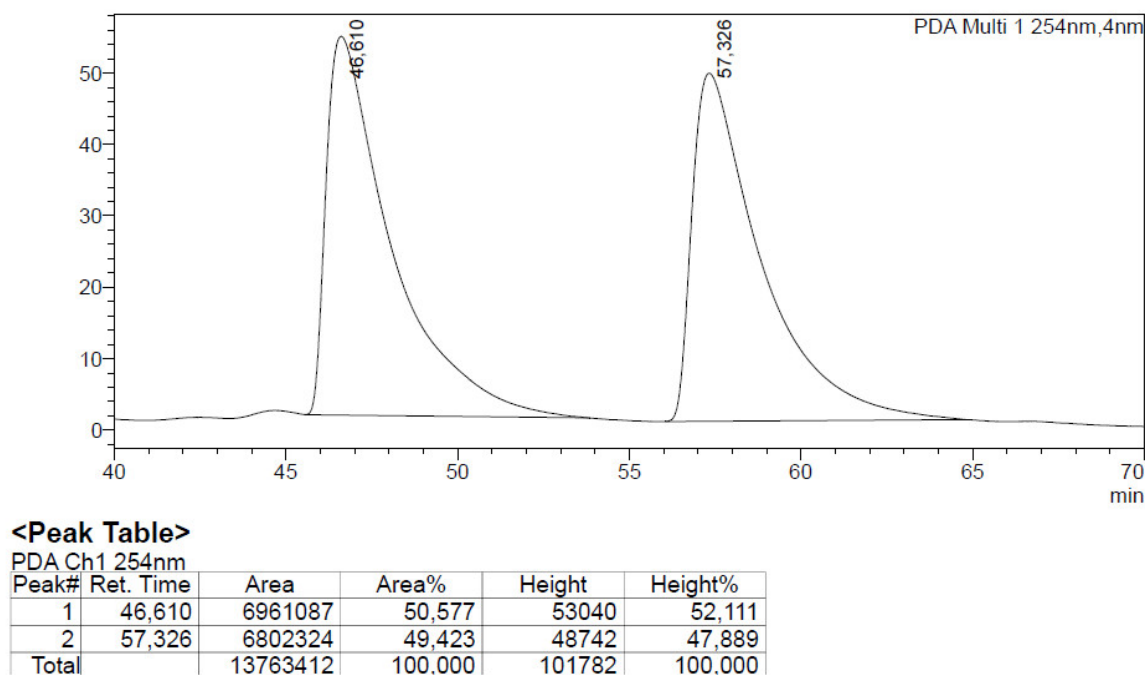

**Figure S4.** HPLC chromatogram obtained with catalyst D/L-Phe-K (racemate).

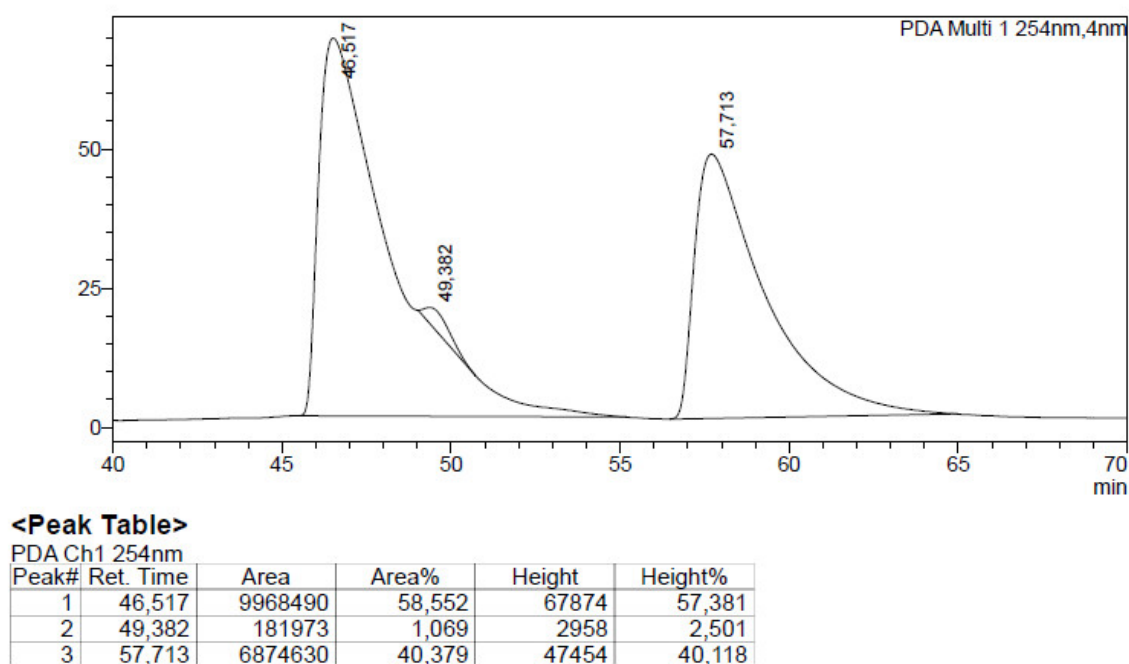

**Figure S5.** HPLC chromatogram obtained with catalyst L-Phe-K (18% ee).

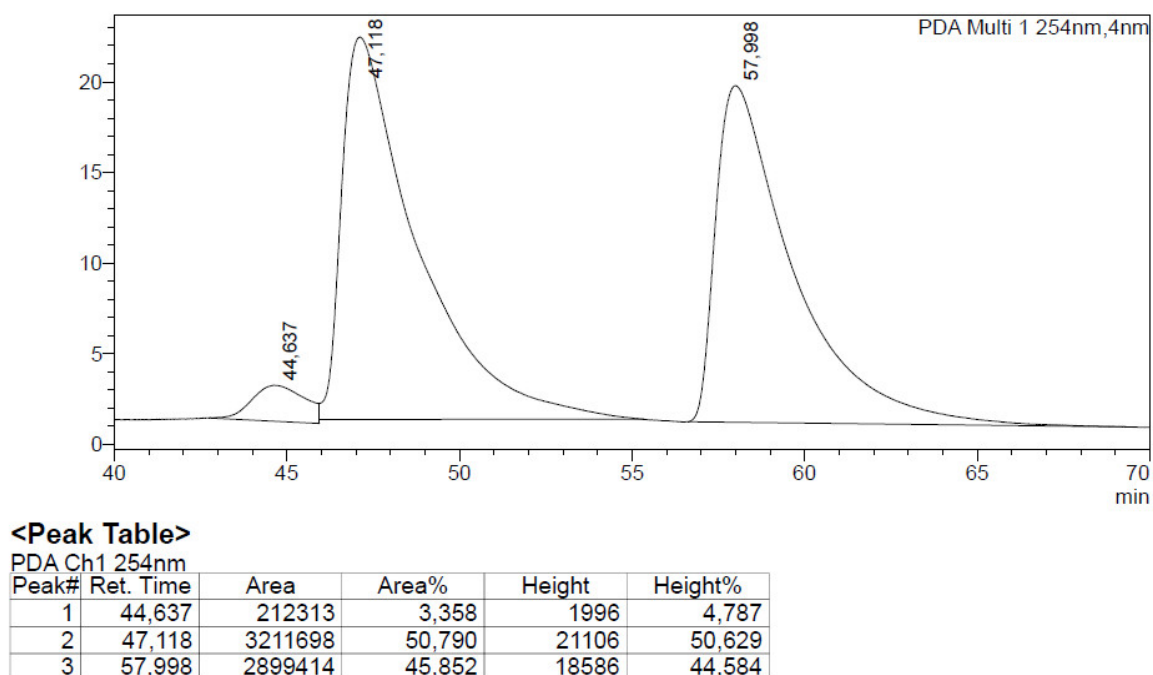

Figure S6. HPLC chromatogram obtained with catalyst L-Pro-K (5% ee).

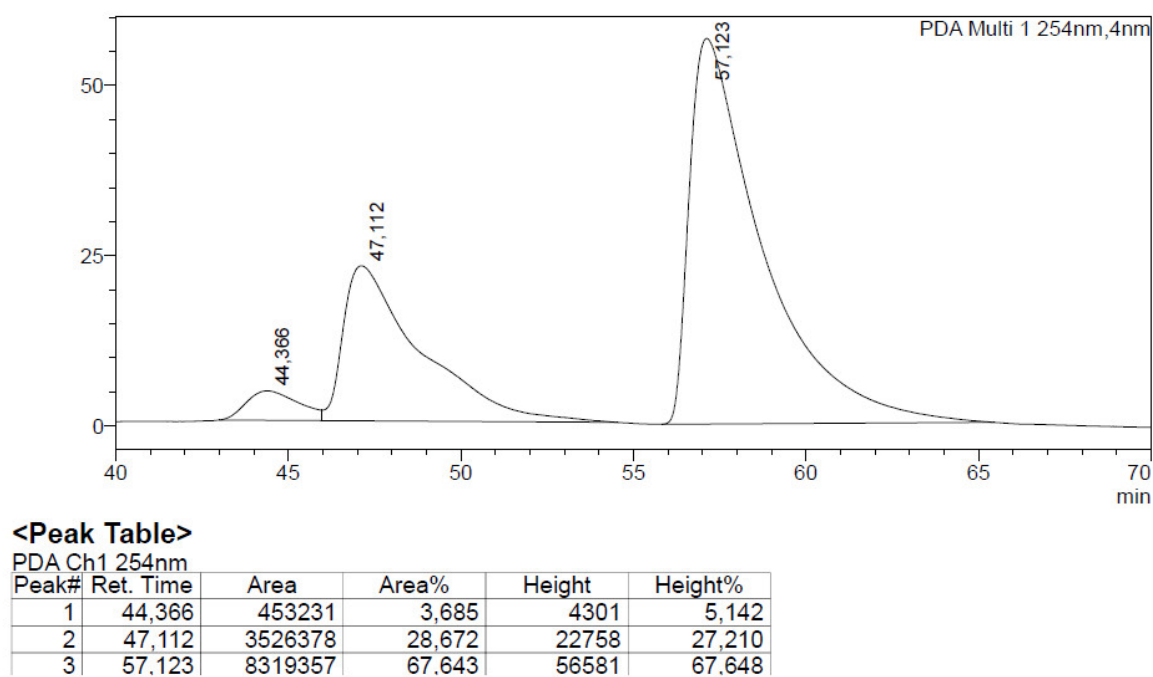

Figure S7. HPLC chromatogram obtained with catalyst L-*tert*-Leu-K (40% ee).

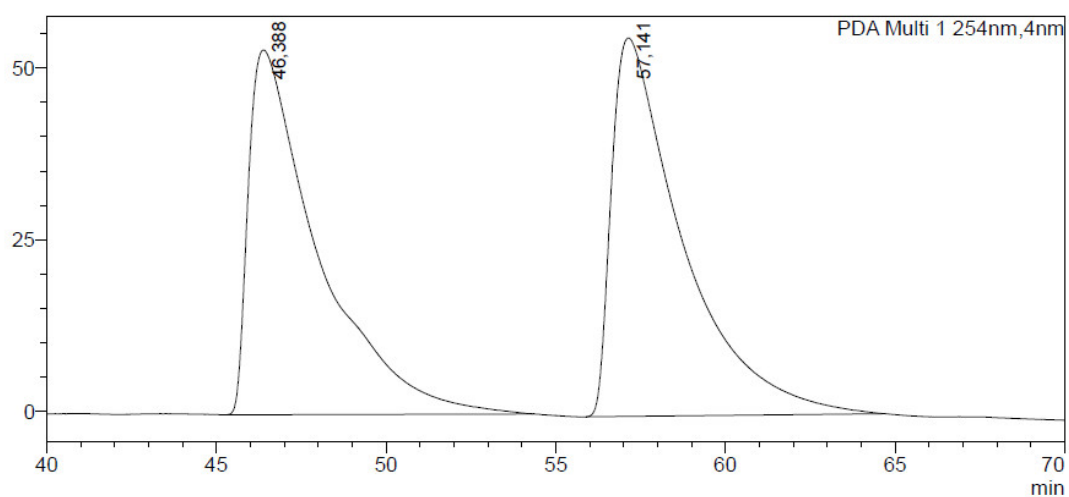

#### <Peak Table>

PDA Ch1 254nm

| Peak# | Ret. Time | Area     | Area%   | Height | Height% |
|-------|-----------|----------|---------|--------|---------|
| 1     | 46,388    | 7572949  | 48,645  | 53087  | 49,077  |
| 2     | 57,141    | 7994885  | 51,355  | 55084  | 50,923  |
| Total |           | 15567834 | 100.000 | 108170 | 100.000 |

Figure S8. HPLC chromatogram obtained with catalyst L-Phe-K (in 1,2-dichloroethane, 3% ee).

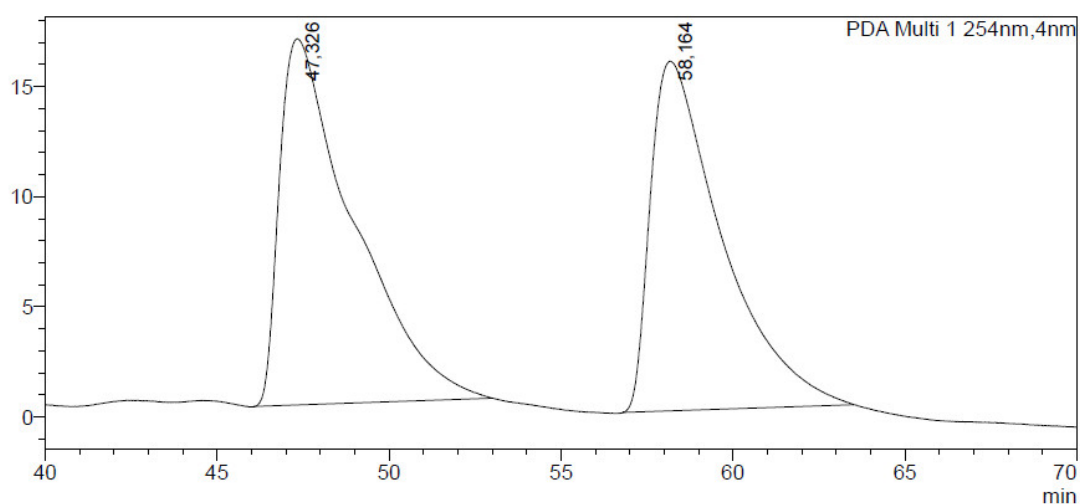

#### <Peak Table>

PDA Ch1 254nm

| Peak# | Ret. Time | Area    | Area%   | Height | Height% |
|-------|-----------|---------|---------|--------|---------|
| 1     | 47,326    | 2482178 | 51,903  | 16634  | 51,153  |
| 2     | 58,164    | 2300186 | 48,097  | 15885  | 48,847  |
| Total |           | 4782364 | 100.000 | 32519  | 100.000 |

Figure S9. HPLC chromatogram obtained with catalyst L-Phe-Na (3% ee).

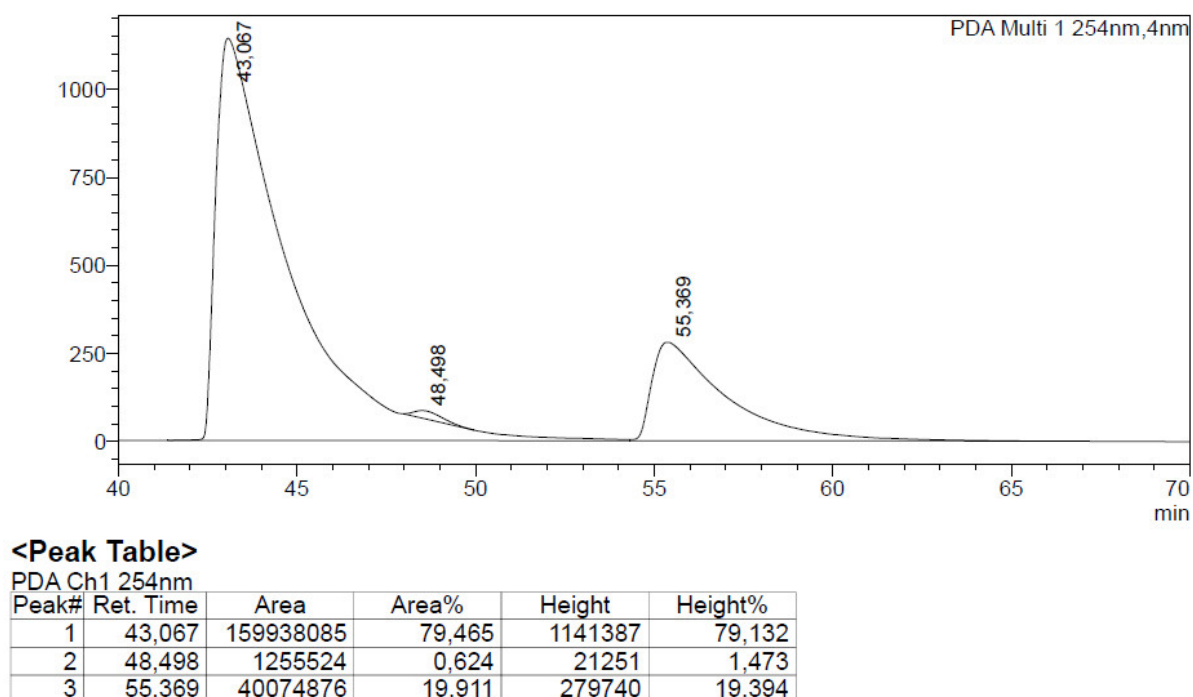

Figure S10. HPLC chromatogram obtained with catalyst TM-2 (60% ee).

### 3. Computational Data

Table S1. Values of relative free energies between main compounds.

|                                 | Compound III |            |            |            | Compound IV |
|---------------------------------|--------------|------------|------------|------------|-------------|
| Number of Structure             | 1            | 2          | 3          | 4          |             |
| Free energy ( $E_h$ )           | -1092.7530   | -1092.7530 | -1092.7520 | -1092.7520 | -1092.7497  |
| Relative free energy (kcal/mol) | -            | -          | 0,69       | 0,68       | 2,12        |
| Structures of compound III      |              |            |            |            | -           |



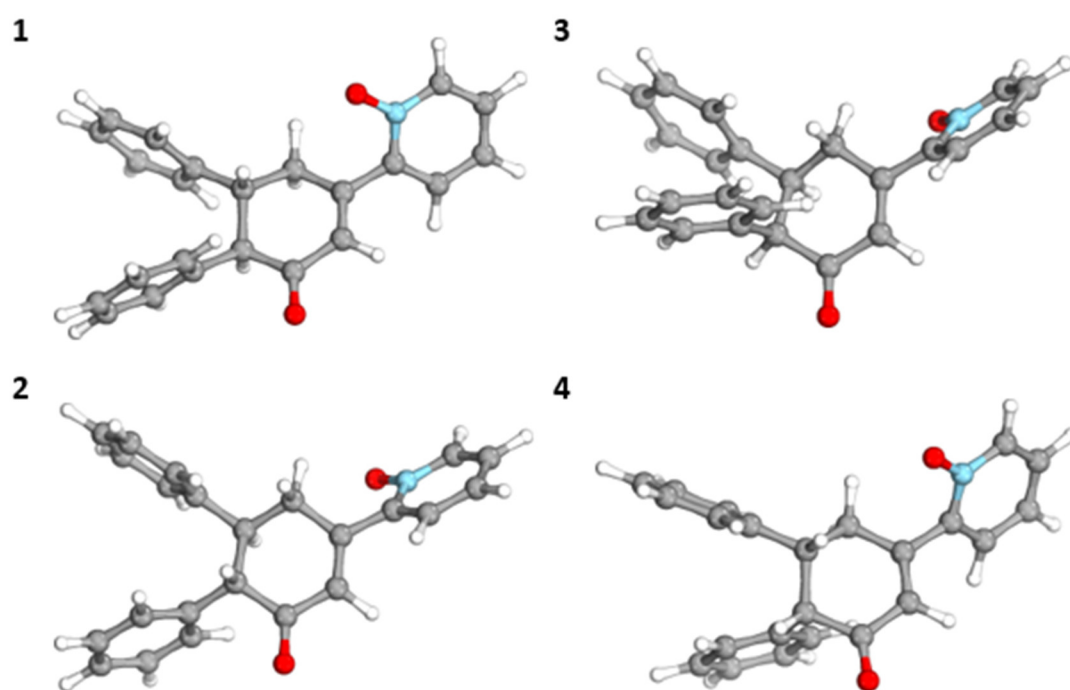

Figure S11. 3D structures of optimized geometries of diastereomers of compound III.
